# Supplementary material for: Expression of Oncogenic Drivers in 3D Cell Culture Depends on Nuclear ATP Synthesis by NUDT5
Source: PubMed Central journal article supplement (PMC6770457; doi:10.3390/cancers11091337), 2019-09-10
Supplement: cancers-11-01337-s001.pdf [file cancers-11-01337-s001.pdf]

**Supplementary Figures**  
**Figure S1**

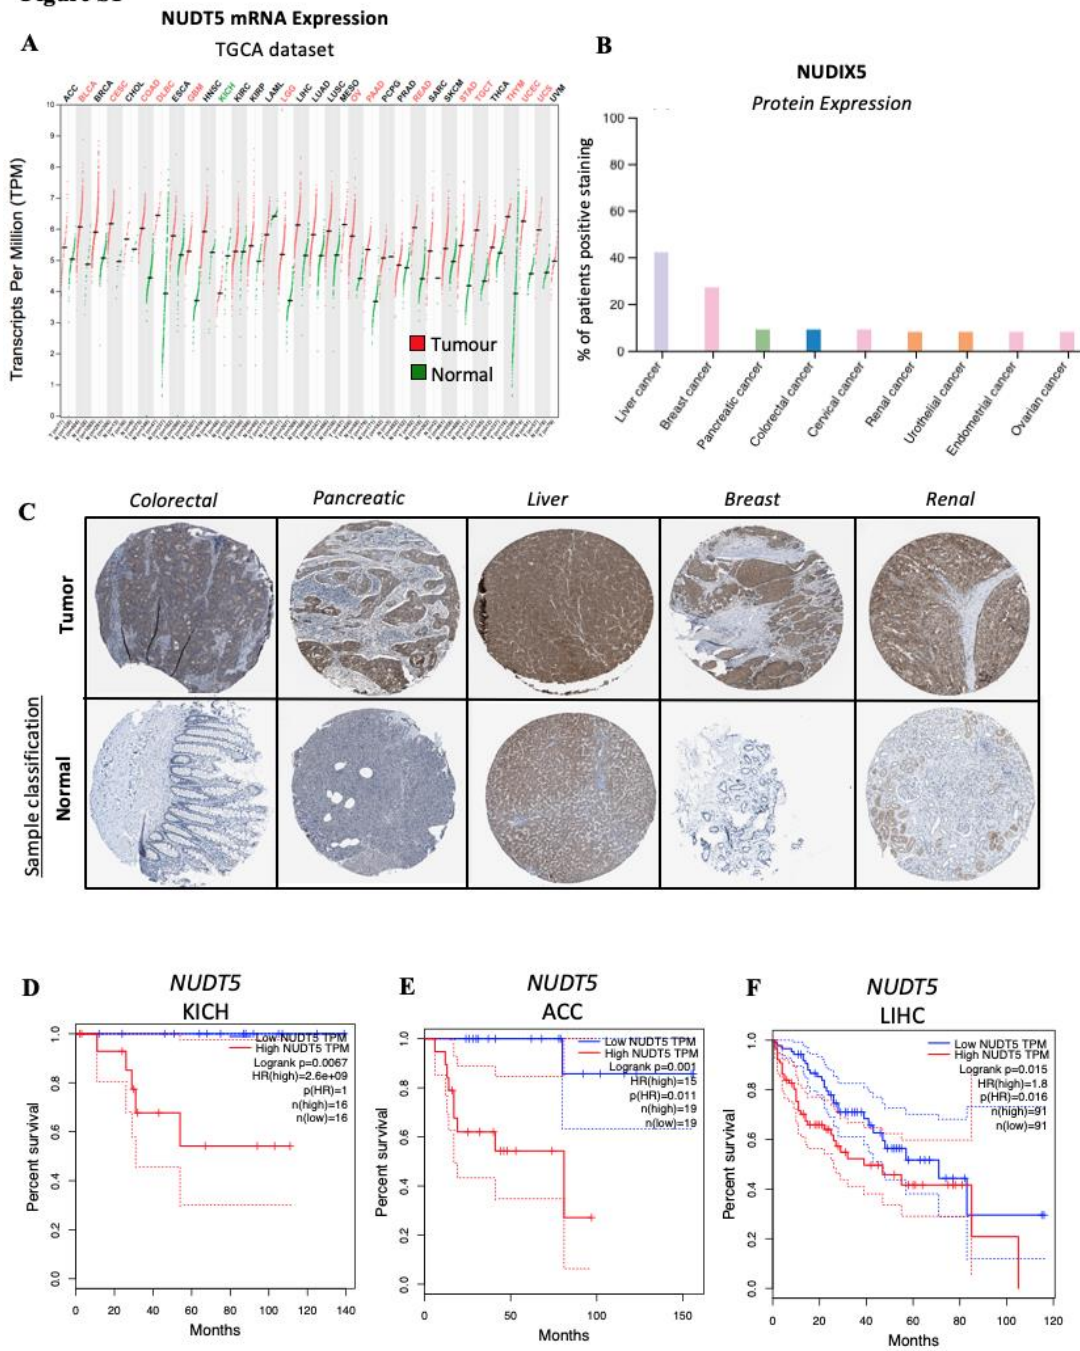

Figure S1 continued

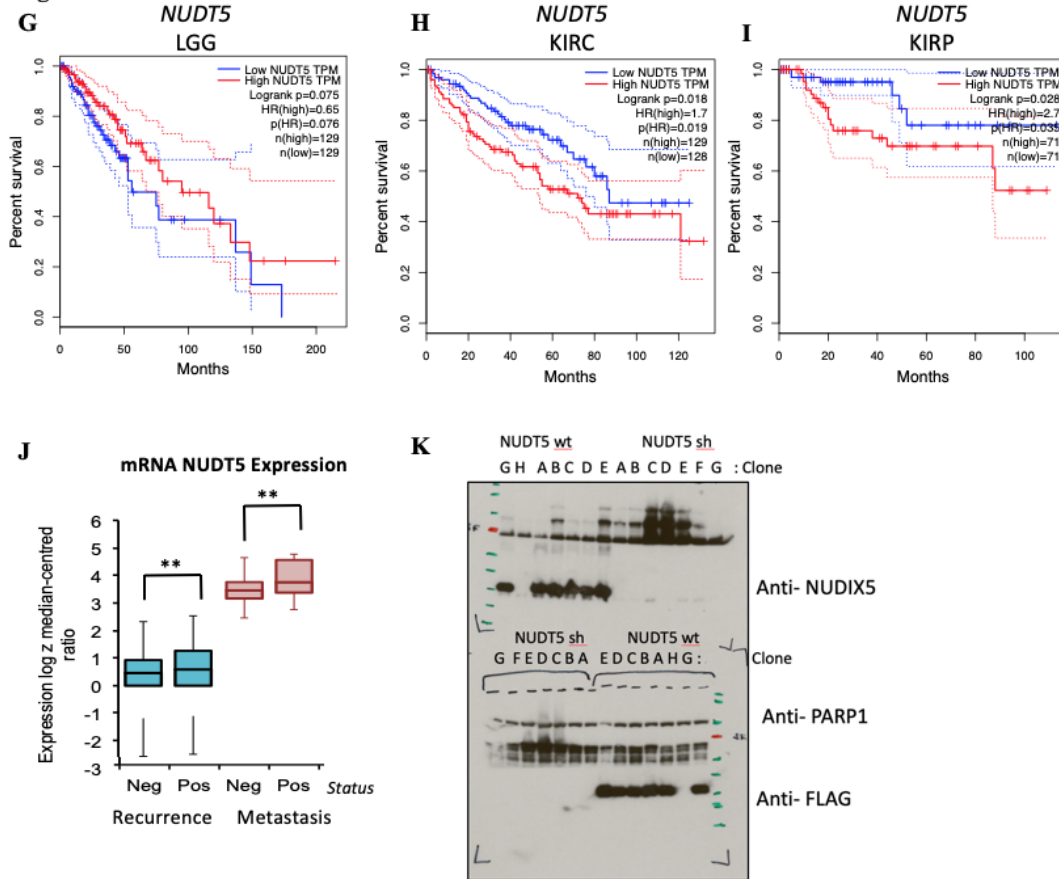

**Figure S1: *NUDT5* is indicative of poor prognosis and aggressive cancer growth.** (A) *NUDT5* mRNA expression across full TCGA database, data for tumour (red) and normal (green) tissue from the same tissue origin are shown using TCGA patient datasets with GEPIA interactive webserver [61]. Datasets where *NUDT5* mRNA levels are elevated in tumour versus normal as highlighted in red, significantly higher in normal versus tumour are marked in green. Abbreviations of the tumour datasets are given in Table S1. (B) The percentage of positive staining for *NUDT5* protein expression in cancer datasets (Human Protein Atlas database [62]). (C) Representative histological staining of *NUDT5* in tumour versus normal patient samples from colorectal, pancreatic, liver, breast and renal samples (Human Protein Atlas database [62]). Metadata regarding each of the images are given in Table S2. Kaplan Meyer survival curves stratifying patients based on *NUDT5* mRNA expression in (D) Kidney chromophobe (KICH). (E) Adrenalcorticoal carcinoma (ACC). (F) Liver hepatocellular carcinoma (LIHG) (G) Brain lower grade carcinoma (LGG) (H) Kidney renal clear cell carcinoma (KIRC) (I) Kidney renal papillary cell carcinoma (KIRP) were carried out using TCGA database with GEPIA interactive webserver [61]. (J) Recurrence and metastasis analysis in *NUDT5* mRNA high expressing patient cohorts from BRCA dataset shown in Figure S1A. (K) Full western blot of *NUDT5*, PARP1 and FLAG protein levels in *NUDT5*<sup>RES</sup> and *NUDT5*<sup>KD</sup> cell clones.

Figure S2

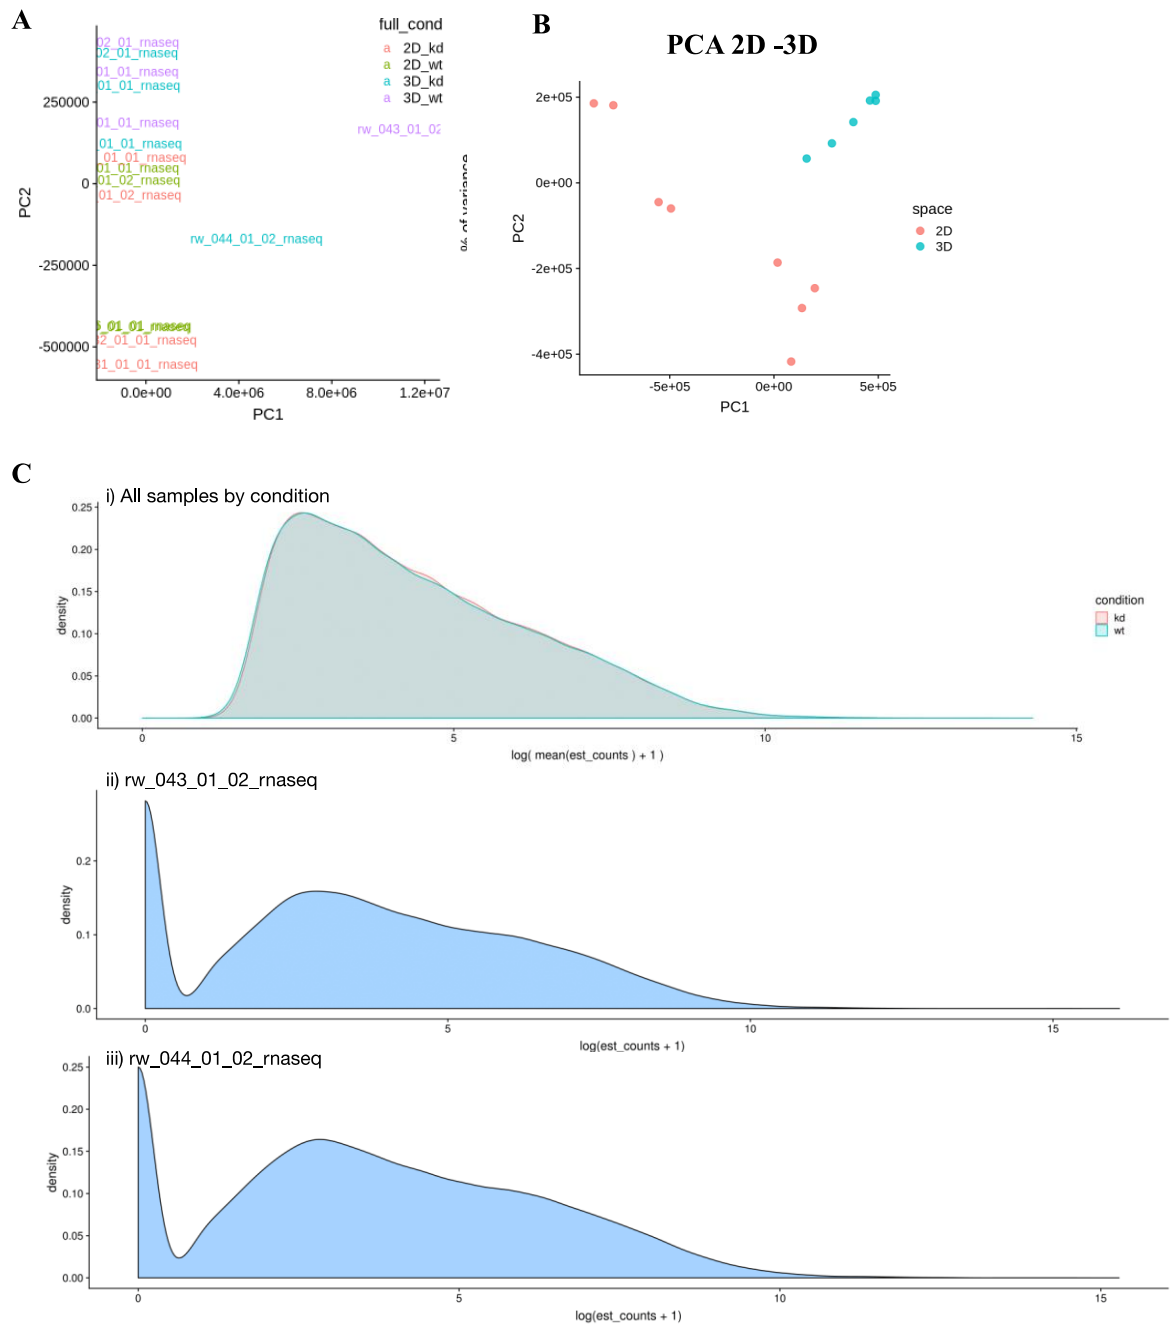

**Figure S2 continued**

**D**

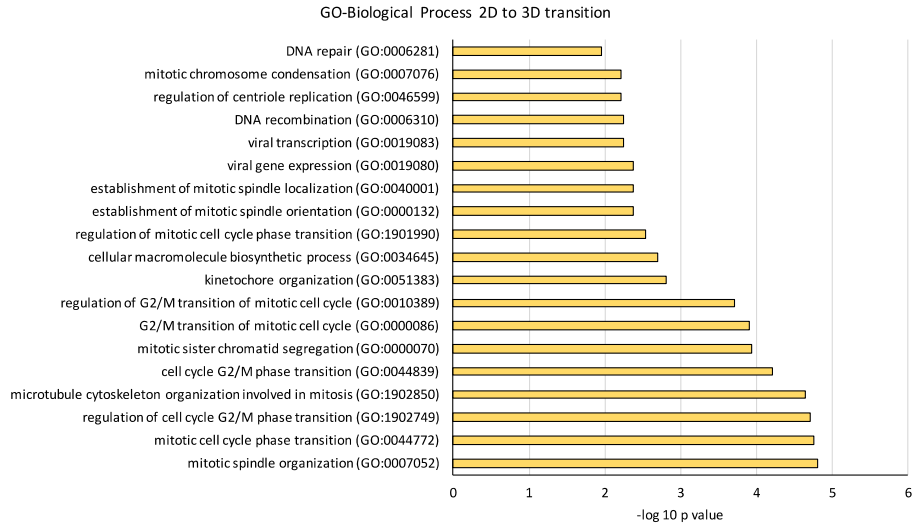

**E**

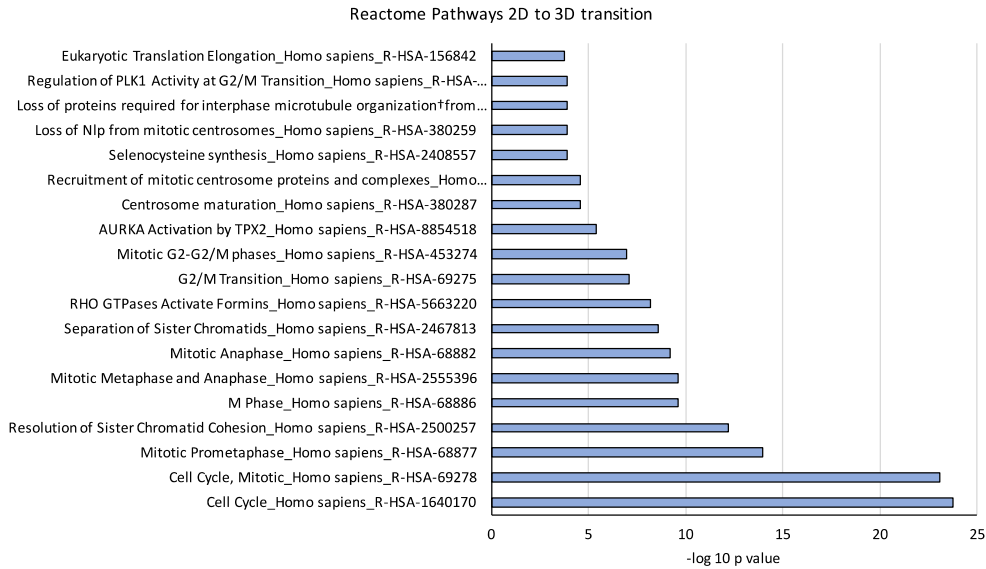

**F**

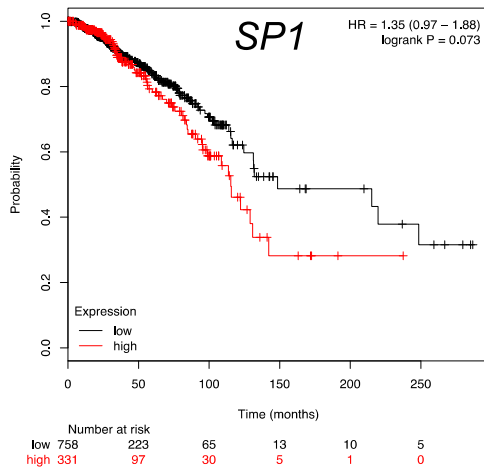

**G**

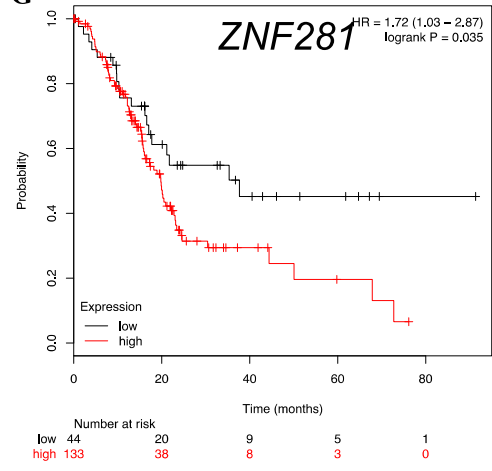

**Figure 2. Analysis of the gene expression changes in 3D compared to 2D culture conditions. (A)** PCA analysis of all RNA samples (Table S3) from T47D cells cultured in 2D and 3D conditions. **(B)** PCA analysis of RNA samples from T47D cells highlighted based on culture conditions. **(C)** Distribution of counts based on all samples (i) or highlighting samples rw\_043\_01\_02\_rnaseq (ii) and rw\_044\_01\_02\_rnaseq (iii). **(D)** GO-Biological process enrichment analysis showing the top 20

differentially expressed gene classes from 2D and 3D cultured cells. A full list of significant terms is given in Table S4. (E) Reactome enrichment analysis of showing top 20 differentially expressed gene classes from 2D and 3D cultured cells. A full list of significant terms is given in Table S5. (F) Kaplan Meyer survival curves stratifying patients based on *SP1* expression in breast cancer and on *ZNF281* (G) in cervical cancer.

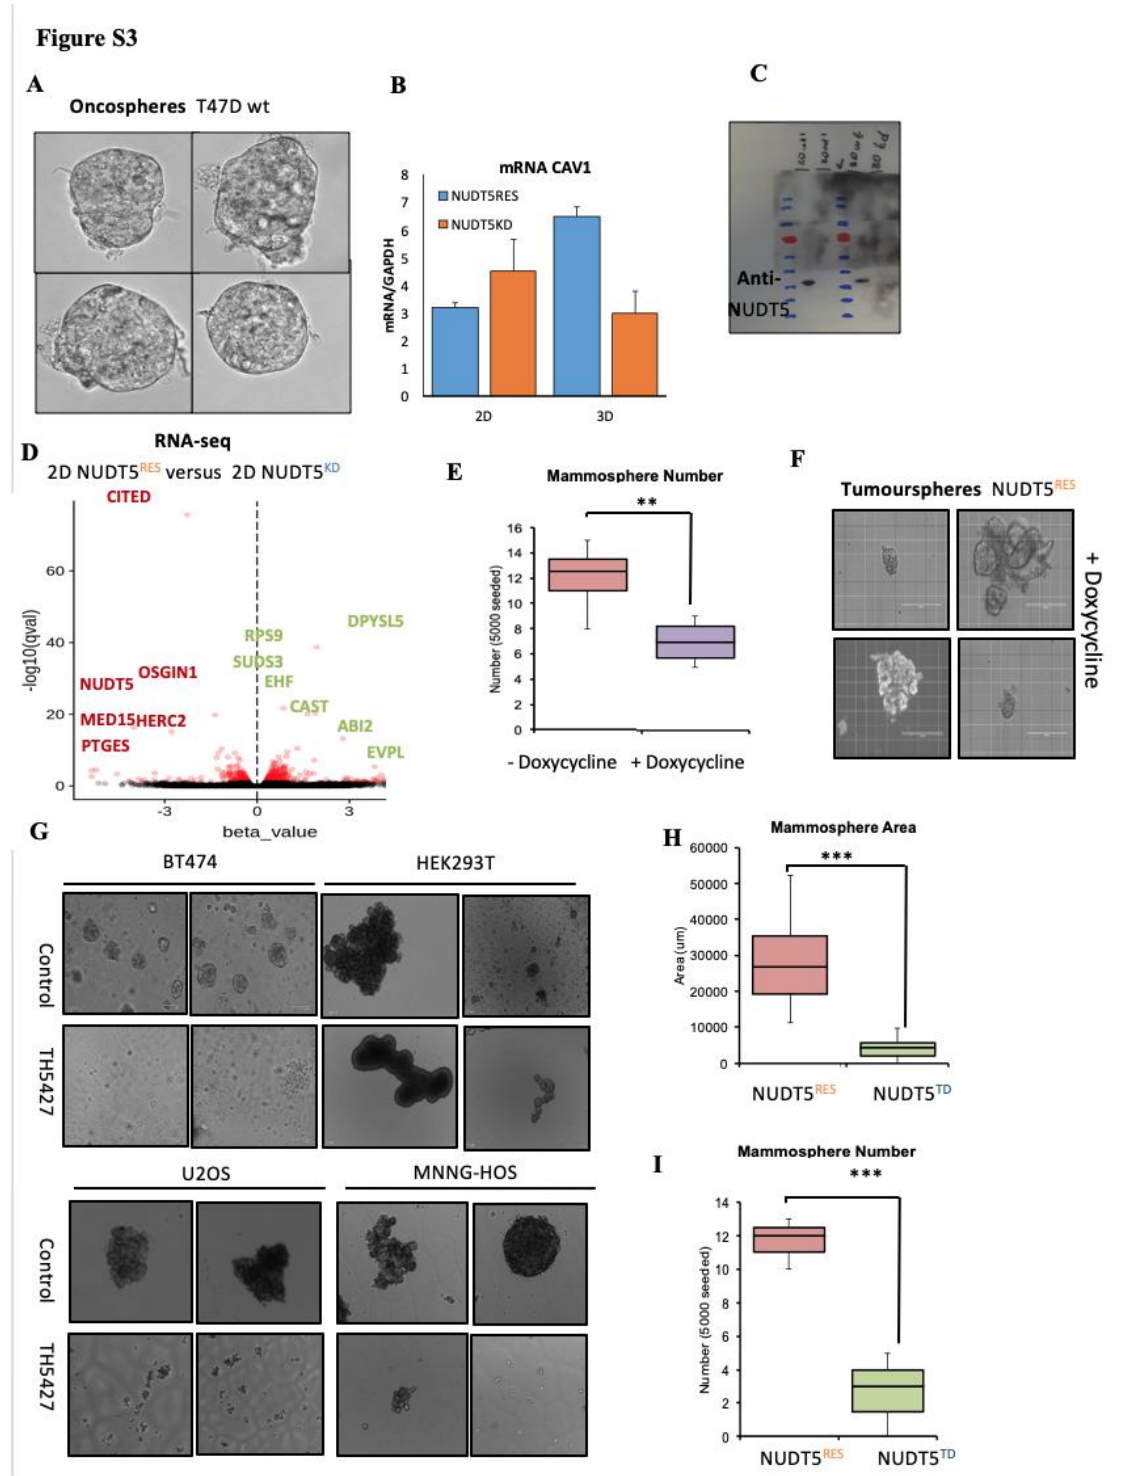

Figure S3: Characterisation of the gene expression changes which dependent on NUDT5 in 3D cell culture.

(A) Representative images of oncospheres in T47D<sup>wt</sup> cells. (B) Relative mRNA expression of *CAV1* in *NUDT5*<sup>RES</sup> versus *NUDT5*<sup>WT</sup> cells grown in 2D and 3D conditions (C) Full western blot showing protein expression levels of *NUDT5* in *NUDT5*<sup>RES</sup> (WT) or *NUDT5*<sup>KD</sup> (KD) cell lines grown in 2D or 3D (oncosphere) conditions. (D) Volcano plot showing the differential gene expression data in *NUDT5*<sup>RES</sup> and *NUDT5*<sup>KD</sup> cell lines cultured in 2D conditions. The position of *NUDT5*, *PTGES*, *CAST*, *CITED* and other genes named within the main body of text are shown. (E) Oncosphere number of *NUDT5*<sup>RES</sup> cell lines grown in the presence or absence of doxycycline; data are mean +/-SEM. (F) Representative images of *NUDT5*<sup>RES</sup> cell lines grown in the presence of doxycycline. (G) Representative images of oncospheres grown with HEK293T, BT474, U2OS and MNNG-HOS cell lines in the presence or absence of TH5427. Oncosphere area (H) and number (I) of *NUDT5*<sup>RES</sup> versus *NUDT5*<sup>TD</sup> cell lines; data are shown as mean +/-SEM.

**Figure S4**

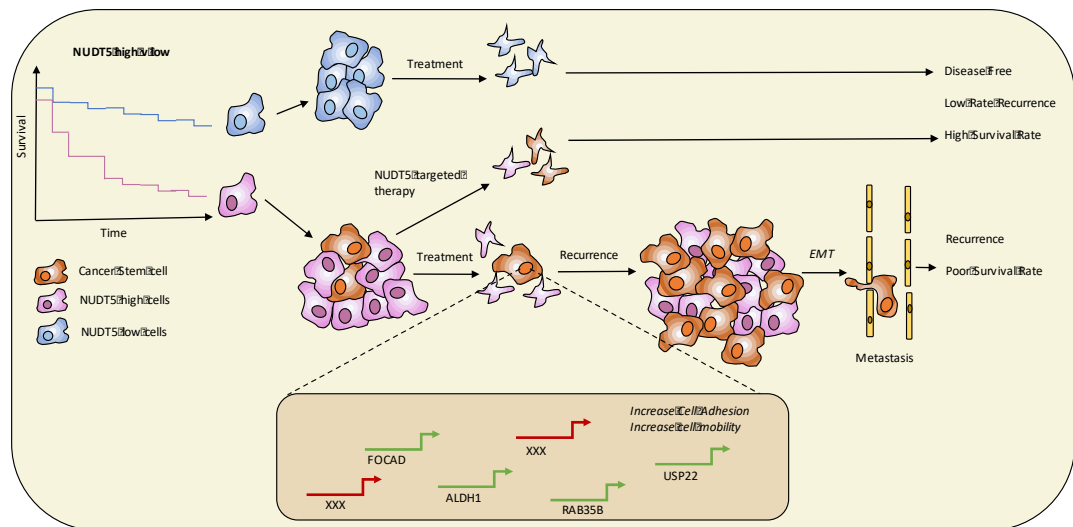

**Figure S4: Model for the role of *NUDT5* in tumour progression.** Stratifying patients based on the expression levels of *NUDT5* predicts a poorer prognosis based on the findings that *NUDT5* activity is essential for key tumour drivers, including genes involved in CSC and EMT. This may enable more targeted selection of patients for drastic therapies.

Figure S5

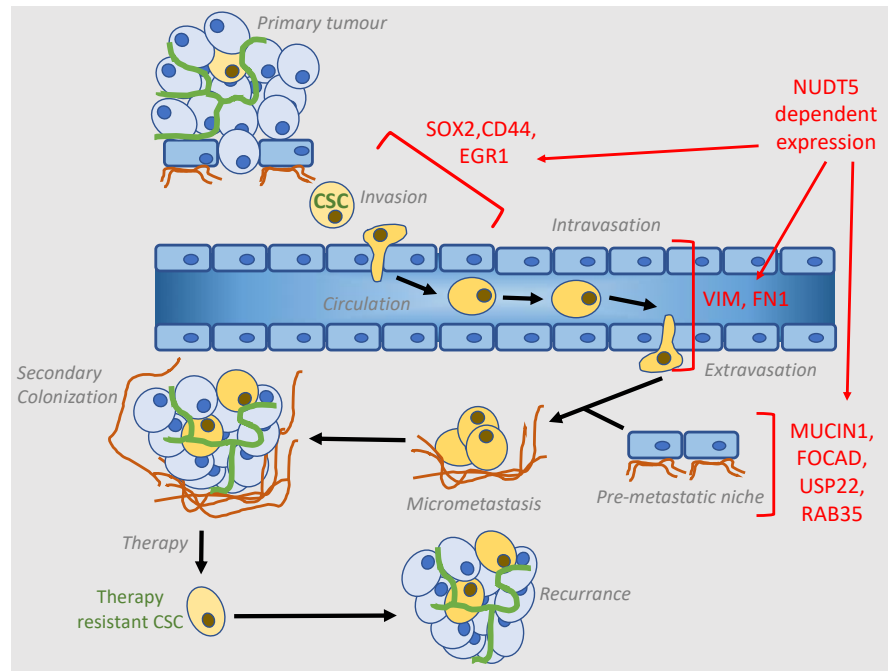

Figure S5: Model for the driving role of NUDT5 expression metastasis.

Diagram depicting the processes during metastasis and the genes expressed during that stage, which are dependent on the ATP generating activities of NUDT5.

**Table S1: Abbreviations for TCGA cancer types.**

| <b>TCGA</b> | <b>Detail</b>                                                    |
|-------------|------------------------------------------------------------------|
| ACC         | Adrenocortical carcinoma                                         |
| BLCA        | Bladder Urothelial Carcinoma                                     |
| BRCA        | Breast invasive carcinoma                                        |
| CESC        | Cervical squamous cell carcinoma and endocervical adenocarcinoma |
| CHOL        | Cholangio carcinoma                                              |
| COAD        | Colon adenocarcinoma                                             |
| DLBC        | Lymphoid Neoplasm Diffuse Large B-cell Lymphoma                  |
| ESCA        | Esophageal carcinoma                                             |
| GBM         | Glioblastoma multiforme                                          |
| HNSC        | Head and Neck squamous cell carcinoma                            |
| KICH        | Kidney Chromophobe                                               |
| KIRC        | Kidney renal clear cell carcinoma                                |
| KIRP        | Kidney renal papillary cell carcinoma                            |
| LAML        | Acute Myeloid Leukemia                                           |
| LGG         | Brain Lower Grade Glioma                                         |
| LIHC        | Liver hepatocellular carcinoma                                   |
| LUAD        | Lung adenocarcinoma                                              |
| LUSC        | Lung squamous cell carcinoma                                     |
| MESO        | Mesothelioma                                                     |
| OV          | Ovarian serous cystadenocarcinoma                                |
| PAAD        | Pancreatic adenocarcinoma                                        |
| PCPG        | Pheochromocytoma and Paraganglioma                               |
| PRAD        | Prostate adenocarcinoma                                          |
| READ        | Rectum adenocarcinoma                                            |
| SARC        | Sarcoma                                                          |
| SKCM        | Skin Cutaneous Melanoma                                          |
| STAD        | Stomach adenocarcinoma                                           |
| TGCT        | Testicular Germ Cell Tumors                                      |
| THCA        | Thyroid carcinoma                                                |
| THYM        | Thymoma                                                          |
| UCEC        | Uterine Corpus Endometrial Carcinoma                             |
| UCS         | Uterine Carcinosarcoma                                           |
| UVM         | Uveal Melanoma                                                   |



**Table S2: IDs from Human Protein Atlas**

| Tissue Type  | Classification | Antibody ID |                    | Patent ID |                                                                                                                                                                                                   |
|--------------|----------------|-------------|--------------------|-----------|---------------------------------------------------------------------------------------------------------------------------------------------------------------------------------------------------|
| Colorectal   | Cancer         | HPA019827   | Colon (T-67000)    | 2151      | <a href="https://www.proteinatlas.org/ENSG00000165609-NUDT5/pathology/tissue/colorectal+cancer#img">https://www.proteinatlas.org/ENSG00000165609-NUDT5/pathology/tissue/colorectal+cancer#img</a> |
| Pancreatic   | Cancer         | HPA019827   | Pancreas (T-59000) | 3614      | <a href="https://www.proteinatlas.org/ENSG00000165609-NUDT5/pathology/tissue/pancreatic+cancer#img">https://www.proteinatlas.org/ENSG00000165609-NUDT5/pathology/tissue/pancreatic+cancer#img</a> |
| Liver Cancer | Cancer         | HPA019827   | Liver (T-56000)    | 2766      | <a href="https://www.proteinatlas.org/ENSG00000165609-NUDT5/pathology/tissue/liver+cancer#img">https://www.proteinatlas.org/ENSG00000165609-NUDT5/pathology/tissue/liver+cancer#img</a>           |
| Breast       | Cancer         | HPA019827   | Breast (T-04000)   | 2428      | <a href="https://www.proteinatlas.org/ENSG00000165609-NUDT5/pathology/tissue/breast+cancer#img">https://www.proteinatlas.org/ENSG00000165609-NUDT5/pathology/tissue/breast+cancer#img</a>         |
| Kidney       | Cancer         | HPA019827   | Kidney (T-71000)   | 3533      | <a href="https://www.proteinatlas.org/ENSG00000165609-NUDT5/pathology/tissue/renal+cancer#img">https://www.proteinatlas.org/ENSG00000165609-NUDT5/pathology/tissue/renal+cancer#img</a>           |
| Colorectal   | Normal         | HPA019827   | Colon (T-67000)    | 1857      | <a href="https://www.proteinatlas.org/ENSG00000165609-NUDT5/tissue/colon#img">https://www.proteinatlas.org/ENSG00000165609-NUDT5/tissue/colon#img</a>                                             |
| Pancreatic   | Normal         | HPA019827   | Pancreas (T-59000) | 2032      | <a href="https://www.proteinatlas.org/ENSG00000165609-NUDT5/tissue/pancreas#img">https://www.proteinatlas.org/ENSG00000165609-NUDT5/tissue/pancreas#img</a>                                       |
| Liver Cancer | Normal         | HPA019827   | Liver (T-56000)    | 3222      | <a href="https://www.proteinatlas.org/ENSG00000165609-NUDT5/tissue/liver#img">https://www.proteinatlas.org/ENSG00000165609-NUDT5/tissue/liver#img</a>                                             |
| Breast       | Normal         | HPA019827   | Breast (T-04000)   | 3544      | <a href="https://www.proteinatlas.org/ENSG00000165609-NUDT5/tissue/breast#img">https://www.proteinatlas.org/ENSG00000165609-NUDT5/tissue/breast#img</a>                                           |
| Kidney       | Normal         | HPA019827   | Kidney (T-71000)   | 3229      | <a href="https://www.proteinatlas.org/ENSG00000165609-NUDT5/tissue/kidney#img">https://www.proteinatlas.org/ENSG00000165609-NUDT5/tissue/kidney#img</a>                                           |

**Table S3: RNA-seq Sample Information**

| Number | Sample              | Space | Condition | full_cond | sequencing |
|--------|---------------------|-------|-----------|-----------|------------|
| 1      | rw_026_01_01_rnaseq | 2D    | wt        | 2D_wt     | 06/27/18   |
| 2      | rw_030_01_01_rnaseq | 2D    | wt        | 2D_wt     | 06/27/18   |
| 3      | rw_031_01_01_rnaseq | 2D    | kd        | 2D_kd     | 06/27/18   |
| 4      | rw_032_01_01_rnaseq | 2D    | kd        | 2D_kd     | 06/27/18   |
| 5      | rw_039_01_01_rnaseq | 3D    | wt        | 3D_wt     | 07/24/18   |
| 6      | rw_039_02_01_rnaseq | 3D    | wt        | 3D_wt     | 07/24/18   |
| 7      | rw_040_01_01_rnaseq | 3D    | kd        | 3D_kd     | 07/24/18   |
| 8      | rw_040_02_01_rnaseq | 3D    | kd        | 3D_kd     | 07/24/18   |
| 9      | rw_041_01_01_rnaseq | 2D    | wt        | 2D_wt     | 02/06/19   |
| 10     | rw_042_01_01_rnaseq | 2D    | kd        | 2D_kd     | 02/06/19   |
| 11     | rw_041_01_02_rnaseq | 2D    | wt        | 2D_wt     | 02/06/19   |
| 12     | rw_042_01_02_rnaseq | 2D    | kd        | 2D_kd     | 02/06/19   |
| 13     | rw_043_01_01_rnaseq | 3D    | wt        | 3D_wt     | 02/06/19   |
| 14     | rw_044_01_01_rnaseq | 3D    | kd        | 3D_kd     | 02/06/19   |
| 15     | rw_043_01_02_rnaseq | 3D    | wt        | 3D_wt     | 02/06/19   |
| 16     | rw_044_01_02_rnaseq | 3D    | kd        | 3D_kd     | 02/06/19   |

**Table S4: Curated gene list based on published gene expression signatures linked to 3D culture growth**

| Reference                                            | Role                          | Genes                                                                                                                                                                                                                                                                                                                                                                                                                                                                                                                                                                                                                                                                                                                                                                         |
|------------------------------------------------------|-------------------------------|-------------------------------------------------------------------------------------------------------------------------------------------------------------------------------------------------------------------------------------------------------------------------------------------------------------------------------------------------------------------------------------------------------------------------------------------------------------------------------------------------------------------------------------------------------------------------------------------------------------------------------------------------------------------------------------------------------------------------------------------------------------------------------|
| Dontu et al 2017                                     | Adhesion                      | <i>HXB,NID,NID2,OSF2</i>                                                                                                                                                                                                                                                                                                                                                                                                                                                                                                                                                                                                                                                                                                                                                      |
| Ginestier et al 2007, Ben-Porath et al 2010          | Pluripotency and stem markers | <i>ALDH1, CD24,CD44, SOX2, NANOG,POU5F1, EPCAM</i>                                                                                                                                                                                                                                                                                                                                                                                                                                                                                                                                                                                                                                                                                                                            |
| Doyle et al 1998,Pece et al 2010,Callari et al 2016, | Breast Cancer Stem cells      | <i>ABCG2,DNER,ITGA6,ITGA6,</i>                                                                                                                                                                                                                                                                                                                                                                                                                                                                                                                                                                                                                                                                                                                                                |
| Dontu et al 2017                                     | Cell cycle                    | <i>CCND2</i>                                                                                                                                                                                                                                                                                                                                                                                                                                                                                                                                                                                                                                                                                                                                                                  |
| Dontu et al 2017                                     | Cytoskeleton                  | <i>PKD2,WASPIP</i>                                                                                                                                                                                                                                                                                                                                                                                                                                                                                                                                                                                                                                                                                                                                                            |
| Callari et al 2016, EMT database                     | EMT                           | <i>ACVR1,ADAM17,AGER,AKT1,AMHR2,ANPEP, ANXA1,AR,ATM,AURKA,AXIN1,AXIN2,AXL,BCL2,BCL2L1,BIRC2,BMI1,BMP2,BMP4,BMP7,BOP1,BRAF,C13orf15,CAMK1D,CAV1,CBR1,CD24 CD24L4,CD274,CDH1,CDH13,CDH2,CDH2,C DKN1B,CDKN2A,CDX2,CLDN1,CLDN4,CLU,CMTM8,COL8A1,COL8A2,CSK,CSNK2B,CTBP1, CTGF,CTNNB1,CTNNBIP1,CTNND1,CTSZ,CXCL12,CXCL16,CXCL5,CXCR4,CXCR4,CYR61,DAB2,DAPK1,DDR2,DDX5,DLX4,DNAJB6,ECT2, EDN1,EDN1,EDNRA,EGF,EGFR,EGR1,EIF5A2, ELF5,ELL3,ENG,EPAS1,EPB41L5,EPO,ERBB2IP, ERF,ESR1,ETV4,EZH2,FBLN5,FGF1,FGF2,FGFR2,FHL2,Fibronectin,FLT1,FN1,FOSL1,FOSL1,FOXA1,FOXC1,FOXC2,FOXO1,FOXO1,FSCN1,FS CN2,GAB2,GATA3,GIPC2,GLRX,GMNN,GREM1,GRIN1,GSK3A,GSK3B,GSN,HAS2,HBEGF,HDAC6,HDGF,HGF,HIF1A,HMGA2,HMGB1,HMGB3,HMOX1,HNF4A,HOXA10,HOXB7,HOXB9, HPGD,HPSE,HRAS,HS3ST3B1,HS6ST2,HSP90</i> |

| Reference | Role | Genes                                                                                                                                                                                                                                                                                                                                                                                                                                                                                                                                                                                                                                                                                                                                                                                                                                                                                                                                                                                                                                                                                                                                                                                                                                                                                                                                                                             |
|-----------|------|-----------------------------------------------------------------------------------------------------------------------------------------------------------------------------------------------------------------------------------------------------------------------------------------------------------------------------------------------------------------------------------------------------------------------------------------------------------------------------------------------------------------------------------------------------------------------------------------------------------------------------------------------------------------------------------------------------------------------------------------------------------------------------------------------------------------------------------------------------------------------------------------------------------------------------------------------------------------------------------------------------------------------------------------------------------------------------------------------------------------------------------------------------------------------------------------------------------------------------------------------------------------------------------------------------------------------------------------------------------------------------------|
|           |      | <p>AA1,HSPA4,HSPB1,HSPB2,ID1,ID1,ID2,IDH1, IDH2,IGF1R,IGFBP3,IL18,IL1B,IL6R,ILK,ITGA5,ITGB1,ITGB3,ITGB4,JAG1,JAG2,JAK2,KCNH1,KHDRBS1,KIT,KL,KLF4,KLF6,KLF8,KLK6,KRAS,KRT19,L1CAM,LAMA1,LAMA5,LATS1,LCN2,LCN2,LEF1,LEFTY1,LEP,LETMD1,LIMA1,LIMS1,LOX,LOXL2,LOXL3,LRP6,LYPD3,MAGED1,MAP2K1,MAP3K3,MAP3K4,MAP3K7,MAPK1,MAPK14,MAPK3,MAPK7,MAPK8,MARVELD3,MCAM,MDK,MET,MGAT3,MKL1,MKL2,MMP13,MMP14,MMP2,MMP3,MMP7,MMP9,MSN,MST1R,MSX2,MTA1,MTA3,MTDH,MUC1,MUC1,MUC16,MUC2,MUC4,MYC,MYCN,N-Cadherin,NCSTN,NDRG1,NF1,NFIC,NFKB1,NOG,NOTCH1,NOTCH2,NRP2,NUMB,OCLN,PAG1,PAK1,PARD3,PARP1,PAX2,PCMT1,PDE4A,PDGFB,PDPN,PHLDA1,PIK3CA,PIN1,PKP3,PLAUR,PLXND1,POSTN,PPARG,PRDX1,PRKCA,PRKCE,PROM1,PRSS8,PTEN,PTGS2,PTHLH,PTK2,PTN,PTPN14,PTPRZ1,RAC1,RAF1,RDX,RGS3,RHOA,RNF111,ROCK1,ROCK2,ROR2,RUNX3,S100A4,SCRIB,SDC1,SDC2,SEMA3E,SEMA4C,SEMA7A,SFTPC,SHH,SIM2,SIX1,SLC39A6,SMAD2,SMAD3,SMAD4,SMAD7,SMAD9,SNAI1,SNAI1,SNAI2,SNAI2,Snail,SNW1,SON,SOX9,SP1,SPP1,SPRR2A,SRC,SRF,ST14,STAT3,STAT5A,STAT5B,STK11,TBX2,TBX20,TBX3,TCF21,TCF3,TCF4,TCF7,TDGF1,TEAD1,TFCP2,TGFA,TGFB1,TGFB1I1,TGFB2,TGFB3,TGFB3,TGFBR1,TGFBR3,TGM2,THBD,TIAM1,TIMP1,TIMP1,TM4SF5,TMPRSS4,TNC,TNF,TP53,TP73,TRPS1, Twist, TWIST1, TXNIP, VCAN, VDR, VEGFA, VIM, VIM, VIM, VSNL1, VTN, VWCE, WISP2, WISP3, WNT1, WNT3A, WNT5A, WNT6, WT1, WWTR1, YAP1, YBX1, YWHAZ, YY1, ZBTB33, ZEB1, ZEB2, ZFYVE9, ZNF217, ZYX</p> |

| Reference              | Role                                          | Genes                                                                                                                                                                                                                                                                                                                                                                                                                                                                                                                                           |
|------------------------|-----------------------------------------------|-------------------------------------------------------------------------------------------------------------------------------------------------------------------------------------------------------------------------------------------------------------------------------------------------------------------------------------------------------------------------------------------------------------------------------------------------------------------------------------------------------------------------------------------------|
| Callari et al<br>2016  | Mammospheres                                  | <i>ABCA12, ABCG1, ACSS1, ALDH3B2, ASS1, BCL6, C9orf152, CAB39L, CASK, CEACAM6, CFB, CKMT1A, CNN2, COMT, CPEB2, CRABP1, CTSA, CYP2J2, DCLK1, DUSP6, EFCAB4A, ENC1, ETV5, FAM129A, FAM134B, FAM46C, FAM83A, HMGCS1, KIAA1199, KIAA1324, KRT81, KRT86, KYNU, LRG1, LTB, MAOA, MGAT4A, MGP, MUCL1, NUCB2, NUPR1, OAS2, PHGDH, PLEKHA4, PMP22, PON2, PRLR, PROM2, PSAT1, QPRT, RRAGD, S100A16, S100A6, S100A8, S100A9, S1PR3, SAT1, SCD, SELENBP1, SERPINA3, SERPINA5, SLC25A18, SOWAHC, SPRY4, TFF3, TM4SF1, TMEM45A, TNFRSF11B, UBE2L6, VIPR1,</i> |
| Dontu et al<br>2017    | Membrane protein up regulated in mammospheres | <i>ABC1, EMP3, FGFR1, FGFR1, FZD2, GHR, GHR, GPC4, IGF2R, NOTCH3, PDGF,</i>                                                                                                                                                                                                                                                                                                                                                                                                                                                                     |
| Dontu et al<br>2017    | Metalloproteases                              | <i>ADAM12, A1oE, DCN, LIM, PTOV1, TIMP3,</i>                                                                                                                                                                                                                                                                                                                                                                                                                                                                                                    |
| Visvader et al<br>2009 | Proliferation                                 | <i>CCNA2, ERBB2, ERBB2, MKI67,</i>                                                                                                                                                                                                                                                                                                                                                                                                                                                                                                              |
| Al Hajj et al<br>2005  | Signalling in oncospheres                     | <i>FYN, GAP43, GPNMB, IGFBP4, IGFBP7, RARRES, SCGF, SCYA2,</i>                                                                                                                                                                                                                                                                                                                                                                                                                                                                                  |
| Dontu et al<br>2017    | Transcription factors in oncospheres          | <i>AEBP1, GAS6, WIG1</i>                                                                                                                                                                                                                                                                                                                                                                                                                                                                                                                        |

**Table S5: Protein complexes alterations in 3D culture.**

| <b>Term</b>                                                       | <b>P-value</b> |
|-------------------------------------------------------------------|----------------|
| c-Src-Muc1 complex                                                | 0.024152978    |
| Cohesin complex,                                                  | 0.024152978    |
| ING1-p300-PCNA complex                                            | 0.036010705    |
| EGR-EP300 complex                                                 | 0.024152978    |
| CAV1-VDAC1-ESR1 complex                                           | 0.036010705    |
| SIN3-ING1b complex I                                              | 0.104203379    |
| OCT1-SOX2 DNA-protein complex                                     | 0.024152978    |
| Skeletal muscle sarcoglycan complex SGC, alpha-beta-gamma-delta   | 0.047724932    |
| Skeletal muscle sarcoglycan complex SGC, alpha-beta-epsilon-gamma | 0.047724932    |
| SIN3-ING1b complex II                                             | 0.177711908    |
| Sarcoglycan-sarcospan-syntrophin-dystrobrevin complex             | 0.104203379    |
| Dystrophin-sarcoglycan-syntrophin complex, skeletal muscle        | 0.115092208    |
| Sarcoglycan-sarcospan-dystroglycan complex                        | 0.070729783    |
| Skeletal muscle sarcoglycan complex SGC, beta-gamma-delta-zeta    | 0.047724932    |
| Sarcoglycan-sarcospan-complex SG-SPN                              | 0.059297388    |
| OCT4-SOX2 DNA-protein complex                                     | 0.024152978    |
| nNos-Capon-Dexas1 complex                                         | 0.036010705    |
| p33ING1b-HDAC1 complex                                            | 0.024152978    |
| P2X7 receptor signalling complex                                  | 0.136475993    |
| Skeletal muscle sarcoglycan complex SGC, epsilon-beta-gamma-delta | 0.047724932    |
| NOS3-CAV1-NOSTRIN complex                                         | 0.036010705    |
| UTM-SGCE-DAG1-CAV1-NOS3 complex                                   | 0.059297388    |
| TF-FVIIa-FXa-TFPI complex                                         | 0.047724932    |
| TRP1-G alpha-11-IP3R3-CAV1 signaling complex                      | 0.047724932    |
| Ternary complex                                                   | 0.036010705    |
| PCI-PSA-SCG2 complex                                              | 0.036010705    |
| Rb-NeuroD1-Ngfi-B complex                                         | 0.036010705    |
| p33ING1b-PCNA complex                                             | 0.024152978    |
| PAX6-SOX2 DNA-protein complex                                     | 0.024152978    |

**Table S6: Gene Ontology Biological Processes altered in 2D to 3D cell culture.**

| <b>GO BP 2D to 3D transition</b>                                       | P-value     | Adjusted P-value |
|------------------------------------------------------------------------|-------------|------------------|
| mitotic spindle organization (GO:0007052)                              | 4.2248E-09  | 1.57205E-05      |
| mitotic cell cycle phase transition (GO:0044772)                       | 9.58861E-09 | 1.78396E-05      |
| regulation of cell cycle G2/M phase transition (GO:1902749)            | 1.60795E-08 | 1.9944E-05       |
| microtubule cytoskeleton organization involved in mitosis (GO:1902850) | 2.41429E-08 | 2.24589E-05      |
| cell cycle G2/M phase transition (GO:0044839)                          | 8.30091E-08 | 6.17754E-05      |
| mitotic sister chromatid segregation (GO:0000070)                      | 1.86088E-07 | 0.000115406      |
| G2/M transition of mitotic cell cycle (GO:0000086)                     | 2.34656E-07 | 0.000124736      |
| regulation of G2/M transition of mitotic cell cycle (GO:0010389)       | 4.16096E-07 | 0.000193537      |
| kinetochore organization (GO:0051383)                                  | 3.76445E-06 | 0.001556393      |
| cellular macromolecule biosynthetic process (GO:0034645)               | 5.35283E-06 | 0.001991787      |
| regulation of mitotic cell cycle phase transition (GO:1901990)         | 8.56354E-06 | 0.002896813      |
| establishment of mitotic spindle orientation (GO:0000132)              | 1.59435E-05 | 0.004237542      |
| establishment of mitotic spindle localization (GO:0040001)             | 1.59155E-05 | 0.004237542      |
| viral gene expression (GO:0019080)                                     | 1.52948E-05 | 0.004237542      |
| viral transcription (GO:0019083)                                       | 2.48221E-05 | 0.00577268       |
| DNA recombination (GO:0006310)                                         | 2.37732E-05 | 0.00577268       |

|                                                                          |                 |             |
|--------------------------------------------------------------------------|-----------------|-------------|
| regulation of centriole replication (GO:0046599)                         | 2.93516<br>E-05 | 0.00606763  |
| mitotic chromosome condensation (GO:0007076)                             | 2.93516<br>E-05 | 0.00606763  |
| DNA repair (GO:0006281)                                                  | 5.72335<br>E-05 | 0.011208729 |
| strand displacement (GO:0000732)                                         | 7.18101<br>E-05 | 0.012145693 |
| establishment of spindle orientation (GO:0051294)                        | 6.66736<br>E-05 | 0.012145693 |
| DNA replication (GO:0006260)                                             | 7.07418<br>E-05 | 0.012145693 |
| establishment of chromosome localization (GO:0051303)                    | 9.52075<br>E-05 | 0.015402915 |
| regulation of steroid biosynthetic process (GO:0050810)                  | 0.000120<br>367 | 0.01735449  |
| SRP-dependent cotranslational protein targeting to membrane (GO:0006614) | 0.000128<br>254 | 0.01735449  |
| metaphase plate congression (GO:0051310)                                 | 0.000120<br>367 | 0.01735449  |
| DNA metabolic process (GO:0006259)                                       | 0.000125<br>41  | 0.01735449  |
| ciliary basal body-plasma membrane docking (GO:0097711)                  | 0.000130<br>59  | 0.01735449  |
| DNA biosynthetic process (GO:0071897)                                    | 0.000146<br>749 | 0.01839593  |
| chromosome condensation (GO:0030261)                                     | 0.000148<br>314 | 0.01839593  |
| regulation of chromosome segregation (GO:0051983)                        | 0.000198<br>688 | 0.023826771 |
| DNA synthesis involved in DNA repair (GO:0000731)                        | 0.000204<br>906 | 0.023826771 |
| cotranslational protein targeting to membrane (GO:0006613)               | 0.000239<br>462 | 0.027001104 |
| centromere complex assembly (GO:0034508)                                 | 0.000301<br>334 | 0.032978323 |
| mitotic nuclear division (GO:0140014)                                    | 0.000312<br>486 | 0.033221761 |
| protein targeting to ER (GO:0045047)                                     | 0.000427<br>431 | 0.040578315 |



|                                                  |                 |             |
|--------------------------------------------------|-----------------|-------------|
| mitotic metaphase plate congression (GO:0007080) | 0.000394<br>141 | 0.040578315 |
| chromosome organization (GO:0051276)             | 0.000435<br>311 | 0.040578315 |
| DNA-dependent DNA replication (GO:0006261)       | 0.000435<br>311 | 0.040578315 |
| regulation of cell cycle process (GO:0010564)    | 0.000436<br>209 | 0.040578315 |

**Table S7: Reactome Pathways 2D to 3D Transition**

| <b>Reactome 2D to 3D transition</b>                                                | <b>Ove<br/>rlap</b> | <b>P-<br/>value</b> |
|------------------------------------------------------------------------------------|---------------------|---------------------|
| Cell Cycle_Homo sapiens_R-HSA-1640170                                              | 137/<br>566         | 1.4819<br>E-27      |
| Cell Cycle, Mitotic_Homo sapiens_R-HSA-69278                                       | 119/<br>462         | 1.3854<br>9E-26     |
| Mitotic Prometaphase_Homo sapiens_R-HSA-68877                                      | 42/1<br>07          | 2.8862<br>1E-17     |
| Resolution of Sister Chromatid Cohesion_Homo sapiens_R-HSA-2500257                 | 38/9<br>9           | 2.2334<br>8E-15     |
| M Phase_Homo sapiens_R-HSA-68886                                                   | 63/2<br>68          | 1.0462<br>4E-12     |
| Mitotic Metaphase and Anaphase_Homo sapiens_R-HSA-2555396                          | 48/1<br>74          | 1.1414<br>8E-12     |
| Mitotic Anaphase_Homo sapiens_R-HSA-68882                                          | 47/1<br>73          | 3.5661<br>E-12      |
| Separation of Sister Chromatids_Homo sapiens_R-HSA-2467813                         | 44/1<br>62          | 1.749E<br>-11       |
| RHO GTPases Activate Formins_Homo sapiens_R-HSA-5663220                            | 35/1<br>14          | 4.9474<br>4E-11     |
| G2/M Transition_Homo sapiens_R-HSA-69275                                           | 43/1<br>73          | 6.4091<br>1E-10     |
| Mitotic G2-G2/M phases_Homo sapiens_R-HSA-453274                                   | 43/1<br>75          | 9.4215<br>6E-10     |
| AURKA Activation by TPX2_Homo sapiens_R-HSA-8854518                                | 23/7<br>2           | 4.3360<br>7E-08     |
| Centrosome maturation_Homo sapiens_R-HSA-380287                                    | 23/7<br>9           | 2.9089<br>7E-07     |
| Recruitment of mitotic centrosome proteins and complexes_Homo sapiens_R-HSA-380270 | 23/7<br>9           | 2.9089<br>7E-07     |
| Eukaryotic Translation Elongation_Homo sapiens_R-HSA-156842                        | 23/8<br>9           | 2.8869<br>4E-06     |
| Selenocysteine synthesis_Homo sapiens_R-HSA-2408557                                | 23/8<br>7           | 1.8880<br>9E-06     |
| Loss of Nlp from mitotic centrosomes_Homo sapiens_R-HSA-380259                     | 20/6<br>9           | 1.8441<br>3E-06     |

|                                                                                                                 |            |                 |
|-----------------------------------------------------------------------------------------------------------------|------------|-----------------|
| Loss of proteins required for interphase microtubule organization†from the centrosome_Homo sapiens_R-HSA-380284 | 20/6<br>9  | 1.8441<br>3E-06 |
| Regulation of PLK1 Activity at G2/M Transition_Homo sapiens_R-HSA-2565942                                       | 23/8<br>7  | 1.8880<br>9E-06 |
| Peptide chain elongation_Homo sapiens_R-HSA-156902                                                              | 22/8<br>4  | 3.7145<br>1E-06 |
| Signaling by Rho GTPases_Homo sapiens_R-HSA-194315                                                              | 58/3<br>67 | 1.9754<br>6E-05 |
| Homologous DNA Pairing and Strand Exchange_Homo sapiens_R-HSA-5693579                                           | 14/4<br>2  | 1.0891<br>8E-05 |
| SUMO E3 ligases SUMOylate target proteins_Homo sapiens_R-HSA-3108232                                            | 23/9<br>6  | 1.1362<br>E-05  |
| Nonsense Mediated Decay (NMD) independent of the Exon Junction Complex (EJC)_Homo sapiens_R-HSA-975956          | 22/8<br>9  | 1.0260<br>7E-05 |
| S Phase_Homo sapiens_R-HSA-69242                                                                                | 26/1<br>24 | 3.9274<br>8E-05 |
| Influenza Viral RNA Transcription and Replication_Homo sapiens_R-HSA-168273                                     | 27/1<br>28 | 2.5139<br>9E-05 |
| Selenoamino acid metabolism_Homo sapiens_R-HSA-2408522                                                          | 25/1<br>11 | 1.5294<br>8E-05 |
| Influenza Life Cycle_Homo sapiens_R-HSA-168255                                                                  | 28/1<br>36 | 2.8665<br>2E-05 |
| Viral mRNA Translation_Homo sapiens_R-HSA-192823                                                                | 21/8<br>4  | 1.3431<br>6E-05 |
| Presynaptic phase of homologous DNA pairing and strand exchange_Homo sapiens_R-HSA-5693616                      | 13/3<br>9  | 2.2419<br>6E-05 |
| SUMOylation_Homo sapiens_R-HSA-2990846                                                                          | 23/1<br>01 | 2.7397<br>1E-05 |
| Influenza Infection_Homo sapiens_R-HSA-168254                                                                   | 29/1<br>47 | 4.7727<br>1E-05 |
| Eukaryotic Translation Termination_Homo sapiens_R-HSA-72764                                                     | 21/8<br>7  | 2.3884<br>E-05  |
| RHO GTPase Effectors_Homo sapiens_R-HSA-195258                                                                  | 42/2<br>55 | 0.0001<br>03611 |
| Formation of a pool of free 40S subunits_Homo sapiens_R-HSA-72689                                               | 22/9<br>6  | 3.6636<br>2E-05 |
| HDR through Homologous Recombination (HRR)_Homo sapiens_R-HSA-5685942                                           | 17/6<br>4  | 3.7826<br>9E-05 |
| 3' -UTR-mediated translational regulation_Homo sapiens_R-HSA-157279                                             | 23/1<br>06 | 6.1492<br>2E-05 |

|                                                                                             |            |                 |
|---------------------------------------------------------------------------------------------|------------|-----------------|
| GTP hydrolysis and joining of the 60S ribosomal subunit_Homo sapiens_R-HSA-72706            | 23/1<br>07 | 7.1714<br>1E-05 |
| L13a-mediated translational silencing of Ceruloplasmin expression_Homo sapiens_R-HSA-156827 | 23/1<br>06 | 6.1492<br>2E-05 |
| Cap-dependent Translation Initiation_Homo sapiens_R-HSA-72737                               | 24/1<br>14 | 7.1643<br>9E-05 |
| Eukaryotic Translation Initiation_Homo sapiens_R-HSA-72613                                  | 24/1<br>14 | 7.1643<br>9E-05 |
| Mitotic G1-G1/S phases_Homo sapiens_R-HSA-453279                                            | 26/1<br>36 | 0.0001<br>9568  |
| G2/M Checkpoints_Homo sapiens_R-HSA-69481                                                   | 27/1<br>50 | 0.0004<br>11326 |

**Table S8: Kegg Pathways 2D to 3D transition**

| <b>Kegg 2D to 3D</b>                       | <b>P-value</b> |
|--------------------------------------------|----------------|
| Homologous recombination                   | 0.00001        |
| Cell cycle                                 | 0.00028        |
| Mismatch repair                            | 0.00063        |
| Steroid biosynthesis                       | 0.00093        |
| Valine, leucine and isoleucine degradation | 0.00316        |
| Progesterone-mediated oocyte maturation    | 0.00317        |
| Insulin resistance                         | 0.00362        |
| DNA replication                            | 0.00395        |
| Synthesis and degradation of ketone bodies | 0.00899        |
| Cellular senescence                        | 0.00953        |
| Thyroid hormone synthesis                  | 0.01475        |
| Ribosome                                   | 0.01998        |
| Fanconi anemia pathway                     | 0.02161        |
| Propanoate metabolism                      | 0.02204        |
| Nucleotide excision repair                 | 0.02333        |
| Base excision repair                       | 0.02585        |
| FoxO signaling pathway                     | 0.02878        |
| Cortisol synthesis and secretion           | 0.03054        |
| Central carbon metabolism in cancer        | 0.03054        |
| Nicotinate and nicotinamide metabolism     | 0.04903        |
| Mucin type O-glycan biosynthesis           | 0.05633        |
| Pyruvate metabolism                        | 0.05821        |
| Mitophagy                                  | *0.066224      |
| Estrogen signaling pathway                 | *0.069164      |
| Ovarian steroidogenesis                    | *0.071377      |

**Table S9: Full transcription factor binding sites motifs**

| FBS cluster name                                                                    | Target gene hits   | Target non-hits | gene | Z-score | Fisher score |
|-------------------------------------------------------------------------------------|--------------------|-----------------|------|---------|--------------|
| <a href="#">C75</a> - <a href="#">Zinc-coordinating::BetaBetaAlpha-zinc finger</a>  | <a href="#">56</a> |                 | 3    | 14.15   | 12.039       |
| <a href="#">C30</a> - <a href="#">Zinc-coordinating::BetaBetaAlpha-zinc finger</a>  | <a href="#">22</a> |                 | 37   | 12.80   | 6.851        |
| <a href="#">C28</a> - <a href="#">Zinc-coordinating::BetaBetaAlpha-zinc finger</a>  | <a href="#">35</a> |                 | 24   | 12.67   | 11.58        |
| <a href="#">C104</a> - <a href="#">Zinc-coordinating::BetaBetaAlpha-zinc finger</a> | <a href="#">48</a> |                 | 11   | 12.20   | 10.734       |
| <a href="#">C65</a> - <a href="#">Zinc-coordinating::BetaBetaAlpha-zinc finger</a>  | <a href="#">22</a> |                 | 37   | 11.52   | 3.411        |
| <a href="#">C88</a> - <a href="#">Zinc-coordinating::BetaBetaAlpha-zinc finger</a>  | <a href="#">40</a> |                 | 19   | 10.75   | 11.208       |
| <a href="#">C27</a> - <a href="#">Zinc-coordinating::BetaBetaAlpha-zinc finger</a>  | <a href="#">34</a> |                 | 25   | 9.136   | 8.208        |
| <a href="#">C34</a> - <a href="#">Zinc-coordinating::BetaBetaAlpha-zinc finger</a>  | <a href="#">27</a> |                 | 32   | 8.843   | 5.076        |
| <a href="#">C129 - Other Alpha-Helix::MADS</a>                                      | <a href="#">7</a>  |                 | 52   | 8.746   | 5.144        |
| <a href="#">C80</a> - <a href="#">Zinc-coordinating::BetaBetaAlpha-zinc finger</a>  | <a href="#">11</a> |                 | 48   | 8.117   | 6.586        |
